# Supplementary material for: Salinity induces carbohydrate accumulation and sugar-regulated starch biosynthetic genes in tomato (Solanum lycopersicum L. cv. ‘Micro-Tom’) fruits in an ABA- and osmotic stress-independent manner
Source: PubMed Central journal article supplement — J Exp Bot. 2009 Dec 8;61(2):563–74. doi: 10.1093/jxb/erp333 (PMC2803223; doi:10.1093/jxb/erp333), 2009-12-08
Supplement: erp333_1.pdf [file erp333_1.pdf]

## ***Supplementary Materials***

**Salinity induces carbohydrate accumulation and sugar-regulated starch biosynthetic genes in tomato (*Solanum lycopersicum* L. cv *Micro-Tom*) fruits in ABA- and osmotic stress-independent manner**

Yong-Gen Yin, Yoshie Kobayashi, Atsuko Sanuki,  
Satoru Kondo, Naoya Fukuda, Hiroshi Ezura,  
Sumiko Sugaya and Chiaki Matsukura

**Supplementary Table 1.** Primer sequences and accession numbers of target Genes for quantitative RT-PCR analysis.

| Gene                | Accession NO. | Primer (5'-3')       |                             | product(bp) |
|---------------------|---------------|----------------------|-----------------------------|-------------|
| <i>AgpL1</i>        | U88089        | Forward              | gcagagaaagccacaattag        | 216         |
|                     |               | Reverse              | actttagttattttagacacgtgtctc |             |
| <i>AgpL2</i>        | U85496        | Forward              | aataaagtaggctggtatgg        | 161         |
|                     |               | Reverse              | taaaagatggaggactgagg        |             |
| <i>AgpL3</i>        | U85497        | Forward              | gaaaaaatgtgttattgcc         | 282         |
|                     |               | Reverse              | aacaacccttctatcatcg         |             |
| <i>AgpS1</i>        | L41126        | Forward              | gctgctggctgcaaaggg          | 258         |
|                     |               | Reverse              | caaatcttgaggggcaacc         |             |
| <i>LeSUT1</i>       | X82275        | Forward              | aactcccggagaaagaagag        | 235         |
|                     |               | Reverse              | tacagttcgcacaccgac          |             |
| <i>Actin(Tom52)</i> | U60482        | Forward <sup>*</sup> | caccattgggtgtgagcgat        | 252         |
|                     |               | Reverse <sup>*</sup> | gggcgacaacctgatcttc         |             |

<sup>\*</sup>This primer sequence was cited from Petreokov et al. (2006)

**Supplementary Table 2.** Effects of ABA, Sucrose and Mannitol on the expression of AGPase genes in developing tomato fruit.

| Gene         | Treatments | Transcription levels | ANOVA  |                |    |
|--------------|------------|----------------------|--------|----------------|----|
| <i>AgpL1</i> | Control    |                      | 1.1021 |                |    |
|              | ABA        | 10 <sup>-2</sup> μM  | 1.2259 | ABA            | NS |
|              |            | 1 μM                 | 1.0285 | Sucrose        | ** |
|              |            | 10 μM                | 1.3025 | Mannitol       | NS |
|              |            | 10 <sup>2</sup> μM   | 2.0796 |                |    |
|              | Sucrose    |                      | 4.0067 | ABA x Sucrose  | ** |
|              | Mannitol   |                      | 1.5406 | ABA x Mannitol | NS |
| <i>AgpL2</i> | Control    |                      | 0.9806 |                |    |
|              | ABA        | 10 <sup>-2</sup> μM  | 1.7882 | ABA            | NS |
|              |            | 1 μM                 | 1.0615 | Sucrose        | NS |
|              |            | 10 μM                | 0.7296 | Mannitol       | *  |
|              |            | 10 <sup>2</sup> μM   | 0.8659 |                |    |
|              | Sucrose    |                      | 1.7922 | ABA x Sucrose  | NS |
|              | Mannitol   |                      | 2.1117 | ABA x Mannitol | NS |
| <i>AgpL3</i> | Control    |                      | 0.895  |                |    |
|              | ABA        | 10 <sup>-2</sup> μM  | 0.7782 | ABA            | NS |
|              |            | 1 μM                 | 1.5254 | Sucrose        | NS |
|              |            | 10 μM                | 0.3477 | Mannitol       | NS |
|              |            | 10 <sup>2</sup> μM   | 0.2711 |                |    |
|              | Sucrose    |                      | 1.0482 | ABA x Sucrose  | ** |
|              | Mannitol   |                      | 0.9543 | ABA x Mannitol | ** |
| <i>AgpS1</i> | Control    |                      | 0.9805 |                |    |
|              | ABA        | 10 <sup>-2</sup> μM  | 1.031  | ABA            | NS |
|              |            | 1 μM                 | 1.3079 | Sucrose        | ** |
|              |            | 10 μM                | 0.9525 | Mannitol       | NS |
|              |            | 10 <sup>2</sup> μM   | 0.6958 |                |    |
|              | Sucrose    |                      | 1.9655 | ABA x Sucrose  | NS |
|              | Mannitol   |                      | 1.3853 | ABA x Mannitol | NS |

NS, \* and \*\* indicate non-significant, significant at  $P < 0.05$  and  $P < 0.01$ , respectively.

## Supplementary Figure 1.

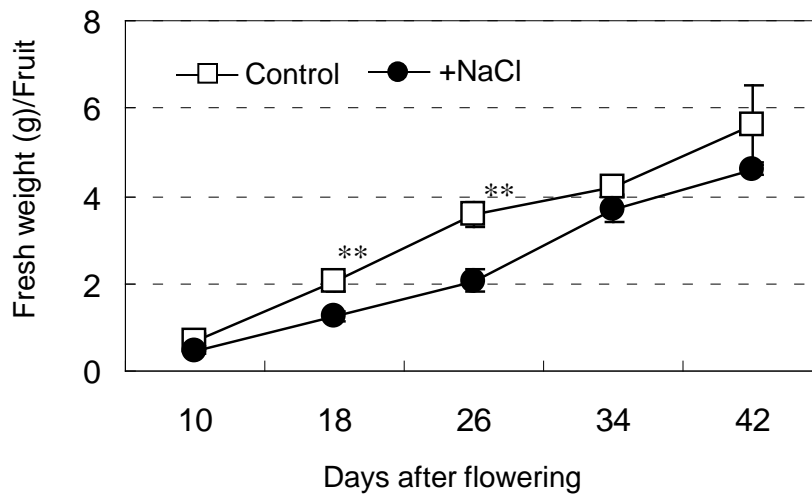

**Supplementary Figure 1.** Fresh weight of developing fruit actually-used in this work. The plants were grown in control or under 160 mM salinity conditions. White squares and black circles indicate control and salinity treatments, respectively. The horizontal axis indicates fruit developing stages (DAF). Values are means  $\pm$  SD ( $n = 10$ ). The asterisks indicate statistical significance of means in the same developing stage estimated using Fisher's PLSD test ( $*P < 0.05$ ,  $**P < 0.01$ ).

## Supplementary Figure 2.

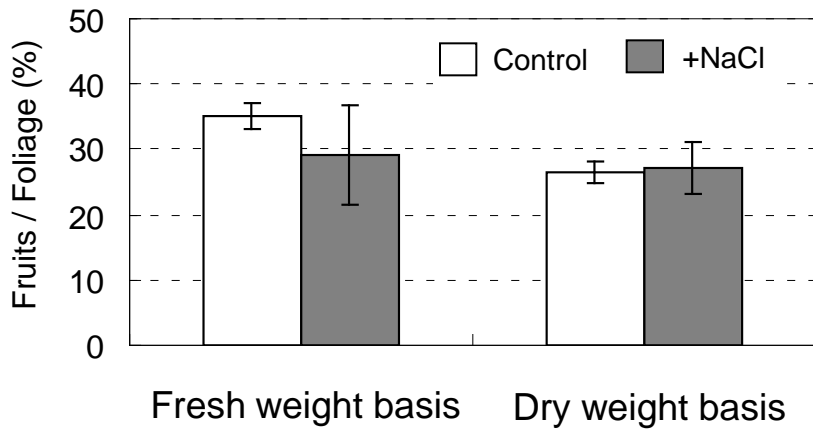

**Supplementary Figure 2.** Fruits / foliage ratio on fresh and dry weight basis of the 14 weeks-old plants grown under control and 160mM of salinity condition. The latter plants were exposed to the stress for 7 weeks after flowering. Values are means  $\pm$  SD (n = 3).

## Supplementary Figure 3.

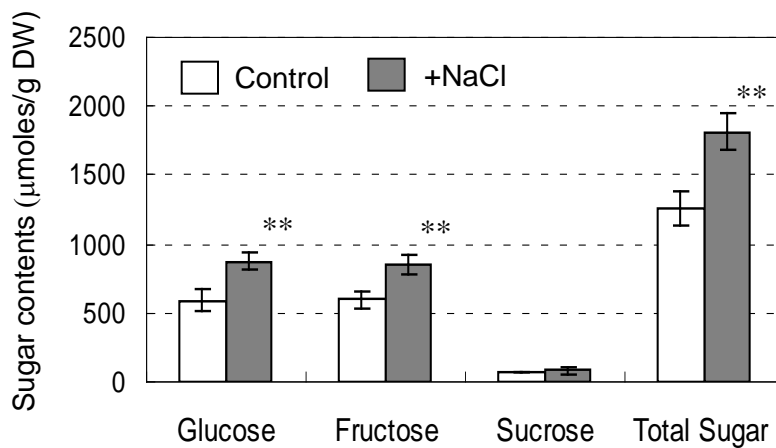

**Supplementary Figure 3.** Soluble sugar contents on dry weight basis in ripe fruits (42 DAF) of plants grown under control and saline conditions. Open and shaded columns indicate control (0 mM NaCl) and salinity treatments (160 mM NaCl). Values are means  $\pm$  SD ( $n = 5$ ). The asterisks indicate statistical significance of means in the same developing stage estimated using Fisher's PLSD test ( $*P < 0.05$ ,  $**P < 0.01$ ).

# Supplementary Figure 4.

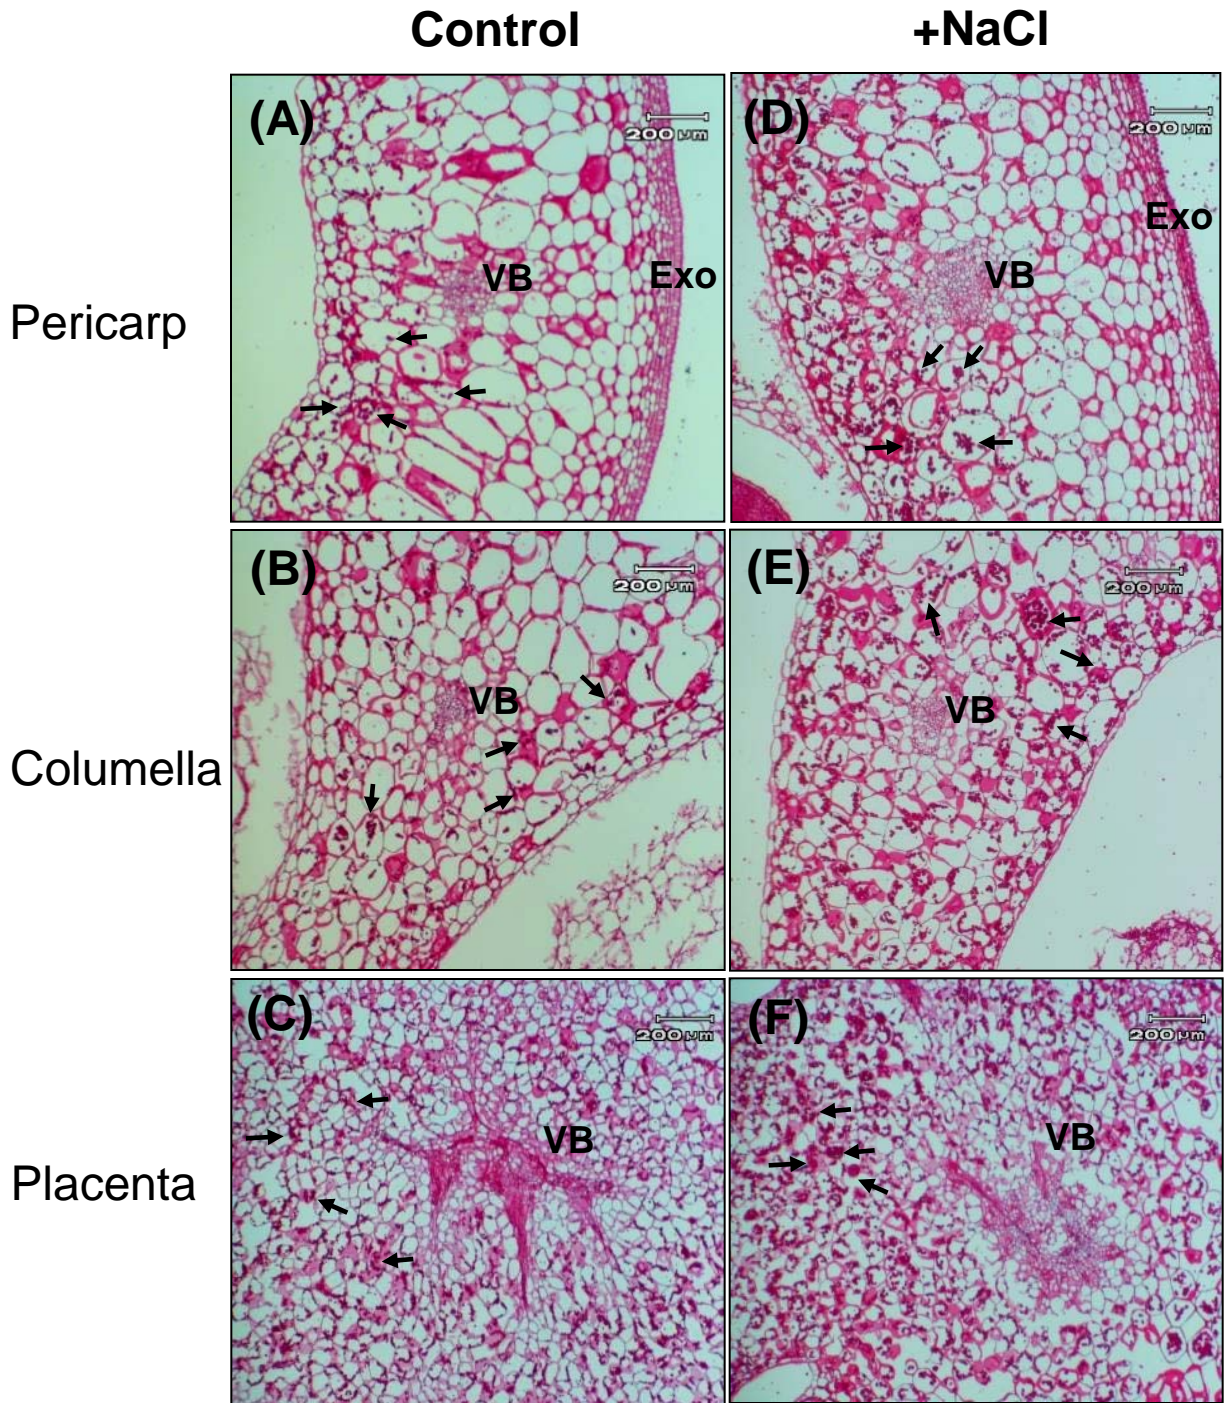

**Supplementary Figure 4.** Accumulation pattern of starch granules in tomato fruit at 10 DAF. Immature-green fruit were sampled from plants grown under control (0 mM NaCl) (A-C) and saline conditions (160 mM NaCl) (D-F). Cross paraffin sections (12 mm thick) were stained by PAS reaction to visualize the starch granules and cell wall. Arrows indicate starch granules. A, D, pericarp; B, E, columella; C, F, placenta. VB, vascular bundle; EX, exocarp. Bar = 0.02 mm.
